# Supplementary material
Source: PubMed Central journal article supplement (PMC7596847)

## SUPPLEMENTAL FIGURE LEGENDS

### Macrophage hypophagia as a mechanism of innate immune exhaustion in mAb-induced cell clearance

Jonathan J. Pinney, Fátima Rivera-Escalera, Charles C. Chu, Hannah Whitehead, Karl VanDerMeid, Ashley M. Nelson, Michelle C. Barbeau, Clive S. Zent, and Michael R. Elliott

#### Supplemental Figure 1. ADCP and hypophagia in BMDM and hMDM.

- (A) Representative images from live-cell imaging ADCP experiments showing macrophages labeled with cell-permeant fluorescent tracer dyes TAMRA SE (BMDM) and Cell Tracker Deep Red (hMDM). BMDM were co-cultured with thymocytes and  $\alpha$ CD90.2. hMDM were co-cultured with CLL cells and ALM mAb. Internalized targets are visible in the macrophages as dye voids, which peak around 1 hr and are largely absent by 6 hr; scale bar, 25 $\mu$ m.
- (B) Comparison of void- versus pH-sensitive dye-based methods to quantify ADCP. *Left y-axis*: Void detection was carried out by live-cell imaging as described in Figure 1A-E for BMDM co-cultured with thymocytes and  $\alpha$ CD90.2. *Right y-axis*: Dye-based detection of phagocytosis was carried out using live-cell imaging of BMDM co-cultured with pHrodo Red STP-labeled thymocytes (a pH-sensitive dye that increases fluorescence upon internalization and acidification in the phagolysosomal pathway).
- (C) Confirmation of void-based detection to analyze target cell clearance resulting from ADCP. Live-cell imaging and void analysis of ADCP was carried out using BMDM co-cultured with  $\alpha$ CD90.2-opsonized thymocytes as in Figure 1A-E (*left y-axis*). Additionally, at the indicated time points, the free/unengulfed thymocytes were collected and counted by flow cytometry. Data on the *right y-axis* show the percentage of the initial input cells that remained in the co-culture wells at the indicated times.

- (D) Live-cell imaging and phagocytosis quantification of BMDM that were initially challenged as indicated (“initial”) for 2 hrs and subsequently re-challenged with  $\alpha$ CD90.2-opsonized thymocytes.
- (E) Representative images demonstrating capacity of hypophagic macrophages to bind mAb-opsonized targets. BMDM and hMDM were induced to undergo hypophagia as described in Figure 1E-H, for 2 hrs. After washing to remove free targets and mAb, macrophages were re-challenged with fresh targets and mAb for 2 hrs. Dye labeled images (above) indicate the lack of phagocytosis. Merging this image with phase contrast channel (below) shows the presence of multiple target cells in close apposition to these dye-labeled macrophages; scale bar, 25 $\mu$ m.

**Supplemental Figure 2. Free IgG does not affect ADCP or hypophagia.**

- (A) Murine BMDM were pre-treated  $\pm$ 20  $\mu$ g/mL non-specific IgG for 1hr in the presence of thymocytes. Following pre-treatment ADCP assay was performed by spiking in 10  $\mu$ g/mL anti-CD90.2 and quantified by live-cell imaging as described in Figure 1A-E. n=3, mean  $\pm$ SEM are shown.
- (B) Quantification of ADCP experiments in (A) for n=3, mean  $\pm$ SEM, unpaired two-tailed Student’s t-test. No significant differences between groups were observed.
- (C) Human MDM were pre-treated  $\pm$ 20  $\mu$ g/mL non-specific IgG for 1hr in the presence of CLL cells. Following pre-treatment ADCP assay was performed by spiking in 10  $\mu$ g/mL ALM and quantified by live-cell imaging as described in Figure 1A-E. n=3, mean  $\pm$ SEM are shown.
- (D) Quantification of ADCP experiments in (C) for n=3, mean  $\pm$ SEM, unpaired two-tailed Student’s t-test. No significant differences between groups were observed.

**Supplemental Figure 3. ADCP in hCD2-iCre-tdTomato mice.**

- (A) Representative flow cytometry data from liver, spleen, and blood of untreated hCD2-iCre-tdTomato mice showing expression of tdTomato is largely restricted to lymphoid populations (CD19<sup>+</sup>, CD3<sup>+</sup>) rather than myeloid populations (Ly6C<sup>+</sup>, F4/80<sup>+</sup>). Pregating: single, live, CD45<sup>+</sup> cells; tdTomato<sup>+</sup> and tdTomato<sup>-</sup> KC are shown in red and blue, respectively.

- (B) Quantification of CD19<sup>+</sup> B cell percentages (of total CD45<sup>+</sup> cells) in blood, spleen, and liver of hCD2-iCre-tdTomato mice at the indicated times following i.v. treatment with 25 µg αCD20. Data shown are n=3, ±SEM, \**p*<0.05, \*\**p*<0.01, \*\*\**p*<0.001, \*\*\*\**p*<0.0001, unpaired one-way ANOVA.
- (C) Thymocytes from C57BL/6J mice were induced to undergo apoptosis by treatment with 10 µM dexamethasone for 4 hrs. Left, representative flow cytometry analysis of Annexin V staining of treated thymocytes. Right, percentage of apoptotic (Annexin V<sup>+</sup>) thymocytes 4 hrs ± dexamethasone treatment. n=3.

#### **Supplemental Figure 4. Mechanisms of ADCP hypophagia.**

- (A) BMDM were co-cultured with thymocytes ± αCD90.2 for 30 and 120 min and supernatants collected and applied to unfed BMDM prior to addition of fresh thymocytes and αCD90.2. ADCP was measured by live-cell imaging as described in Figure 1A-E.
- (B) Flow cytometry analysis of FcγRIIa/b and FcγRIIIa surface levels on hMDM co-cultured with CLL cells in the absence (grey) or presence (color) of ALM mAb for 2 hrs. Unstained control shown as dashed line. Bar graphs to the right show quantification of relative MFI for each receptor for n=3, mean ±SEM, \*\*\*\**p*<0.0001, unpaired two-tailed t-test.

#### **Supplemental Figure 5. Relative surface expression of FcγRI and FcγRIIb 6hrs post-hypophagia induction.**

- (A) Representative histogram showing BMDM that were co-cultured with thymocytes ±anti-CD90.2 for 2 hrs to induce hypophagia, then targets and free antibody were washed away and BMDM were cultured in fresh medium for 6 hrs. Surface levels of FcγRI were then measured by flow cytometry. Unstained control shown as dashed line.
- (B) MFI quantification for (A) are shown for n=5, mean ±SEM, \**p*<0.05, unpaired two-tailed t-test.
- (C) Representative histogram showing BMDM treated as described in (A). Surface levels of FcγRIIb were then measured by flow cytometry. Unstained control shown as dashed line.
- (D) MFI quantification for (C) are shown for n=5, mean ±SEM, \**p*<0.05, unpaired two-tailed t-test.

**Supplemental Figure 6. Representative histograms for FcγRI and FcγRIIb intracellular flow cytometry staining.**

- (A) Representative histogram of intracellular staining and flow cytometry for surface levels of FcγRI as shown in Figure 4A. Unstained control shown as dashed line.
- (B) Representative histogram of intracellular staining and flow cytometry for total (intracellular + surface) levels of FcγRI as shown in Figure 4A. Unstained control shown as dashed line.
- (C) Representative histogram of intracellular staining and flow cytometry for surface levels of FcγRIIb as shown in Figure 4B. Unstained control shown as dashed line.
- (D) Representative histogram of intracellular staining and flow cytometry for total (intracellular + surface) levels of FcγRIIb as shown in Figure 4B. Unstained control shown as dashed line.

**Supplemental Figure 7. Blocking FcγR degradation does not affect hypophagia.**

- (A) BMDM were pretreated  $\pm$  100 nM Bafilomycin A1 for 3 hrs prior to addition of thymocytes and  $\alpha$ CD90.2. ADCP was measured by live-cell imaging and the phagocytic index calculated as described in Figure 1A-E.
- (B) Flow cytometry analysis of FcγRI surface levels on unfed and hypophagic ( $\alpha$ CD90.2-opsonized thymocytes, 2 hrs) BMDM that were treated with 25  $\mu$ M MG132 3 hrs prior to addition of fresh thymocytes and  $\alpha$ CD90.2. n=3, \*\*\* $p$ <0.001, unpaired one-way ANOVA.
- (C) Flow cytometry analysis of FcγRIIb surface levels on unfed and hypophagic ( $\alpha$ CD90.2-opsonized thymocytes, 2 hrs) BMDM that were treated with 25  $\mu$ M MG132 3 hrs prior to addition of fresh thymocytes and  $\alpha$ CD90.2. n=3, \*\*\*\* $p$ <0.0001, unpaired one-way ANOVA.

**Supplemental Figure 8. Comparison of unfed and hypophagic macrophage ADCP after 24 hr recovery in presence of recombination IFN $\gamma$  or C5a.**

- (A) Murine BMDM were incubated with thymocytes  $\pm$  anti-CD90.2 for 2hr in the presence of thymocytes. Free thymocytes and antibody were then washed away and BMDM were cultured 24 hrs  $\pm$  recombinant IFN $\gamma$  (50 ng/mL). After 24 hrs BMDM were re-challenged with fresh thymocytes and 10 $\mu$ g/mL  $\alpha$ CD90.2 for another 2 hours and ADCP was measured by live cell imaging as in Figure 1E. Data shown are mean  $\pm$  SEM, n=3.

- (B) Murine BMDM were incubated with thymocytes  $\pm$  anti-CD90.2 for 2hr in the presence of thymocytes. Free thymocytes and antibody were then washed away and BMDM were cultured 24 hrs  $\pm$  recombinant C5a (50 ng/mL). After 24 hrs BMDM were re-challenged as in (A) and ADCP was measured by live cell imaging as in Figure 1E. Data shown are mean  $\pm$  SEM, n=3.
- (C) Quantification of ADCP experiments in A-B for n=3, mean  $\pm$  SEM, \*\*p<0.01, unpaired two-tailed Student's t-test.

# SUPPLEMENTAL VIDEO LEGENDS

## **Macrophage hypophagia as a mechanism of innate immune exhaustion in mAb-induced cell clearance**

Jonathan J. Pinney, Fátima Rivera-Escalera, Charles C. Chu, Hannah Whitehead, Karl VanDerMeid, Ashley M. Nelson, Michelle C. Barbeau, Clive S. Zent, and Michael R. Elliott

### **Supplemental Video 1.**

Representative video showing ADCP by murine BMDM, labeled with Cell Tracker Deep Red, upon primary challenge (1<sup>st</sup> challenge) with  $\alpha$ CD90.2 opsonized thymocytes. Cell Tracker Deep Red and Phase Contrast channels are shown together to illustrate interaction between macrophages and target cells. Scale bar, 25 $\mu$ M.

### **Supplemental Video 2.**

Representative video showing ADCP by murine BMDM, labeled with Cell Tracker Deep Red, upon primary challenge (1<sup>st</sup> challenge) with  $\alpha$ CD90.2 opsonized thymocytes. Cell Tracker Deep Red channel is shown alone to illustrate formation and processing of “dye voids.” Scale bar, 25 $\mu$ M.

### **Supplemental Video 3.**

Representative video showing ADCP by hypophagic murine BMDM, labeled with Cell Tracker Deep Red, upon secondary challenge (2<sup>nd</sup> challenge) with  $\alpha$ CD90.2 opsonized thymocytes. Cell Tracker Deep Red and Phase Contrast channels are shown together to illustrate interaction between macrophages and target cells. Scale bar, 25 $\mu$ M.

### **Supplemental Video 4.**

Representative video showing ADCP by hypophagic murine BMDM, labeled with Cell Tracker Deep Red, upon secondary challenge (2<sup>nd</sup> challenge) with  $\alpha$ CD90.2 opsonized thymocytes. Cell Tracker Deep Red channel is shown alone to illustrate formation and processing of “dye voids,” which is greatly reduced in hypophagic macrophages. Scale bar, 25 $\mu$ M.

#### **Supplemental Video 5.**

Representative video showing ADCP by human MDM, labeled with Cell Tracker Deep Red, upon primary challenge (1<sup>st</sup> challenge) with ALM opsonized CLL cells. Cell Tracker Deep Red and Phase Contrast channels are shown together to illustrate interaction between macrophages and target cells. Scale bar, 25 $\mu$ M.

#### **Supplemental Video 6.**

Representative video showing ADCP by human MDM, labeled with Cell Tracker Deep Red, upon primary challenge (1<sup>st</sup> challenge) with ALM opsonized CLL cells. Cell Tracker Deep Red channel is shown alone to illustrate formation and processing of “dye voids.” Scale bar, 25 $\mu$ M.

#### **Supplemental Video 7.**

Representative video showing ADCP by hypophagic human MDM, labeled with Cell Tracker Deep Red, upon secondary challenge (2<sup>nd</sup> challenge) with ALM opsonized CLL cells. Cell Tracker Deep Red and Phase Contrast channels are shown together to illustrate interaction between macrophages and target cells. Scale bar, 25 $\mu$ M.

#### **Supplemental Video 8.**

Representative video showing ADCP by hypophagic human MDM, labeled with Cell Tracker Deep Red, upon secondary challenge (2<sup>nd</sup> challenge) with ALM opsonized CLL cells. Cell Tracker Deep Red channel is shown alone to illustrate formation and processing of “dye voids,” which is greatly reduced in hypophagic macrophages. Scale bar, 25 $\mu$ M.

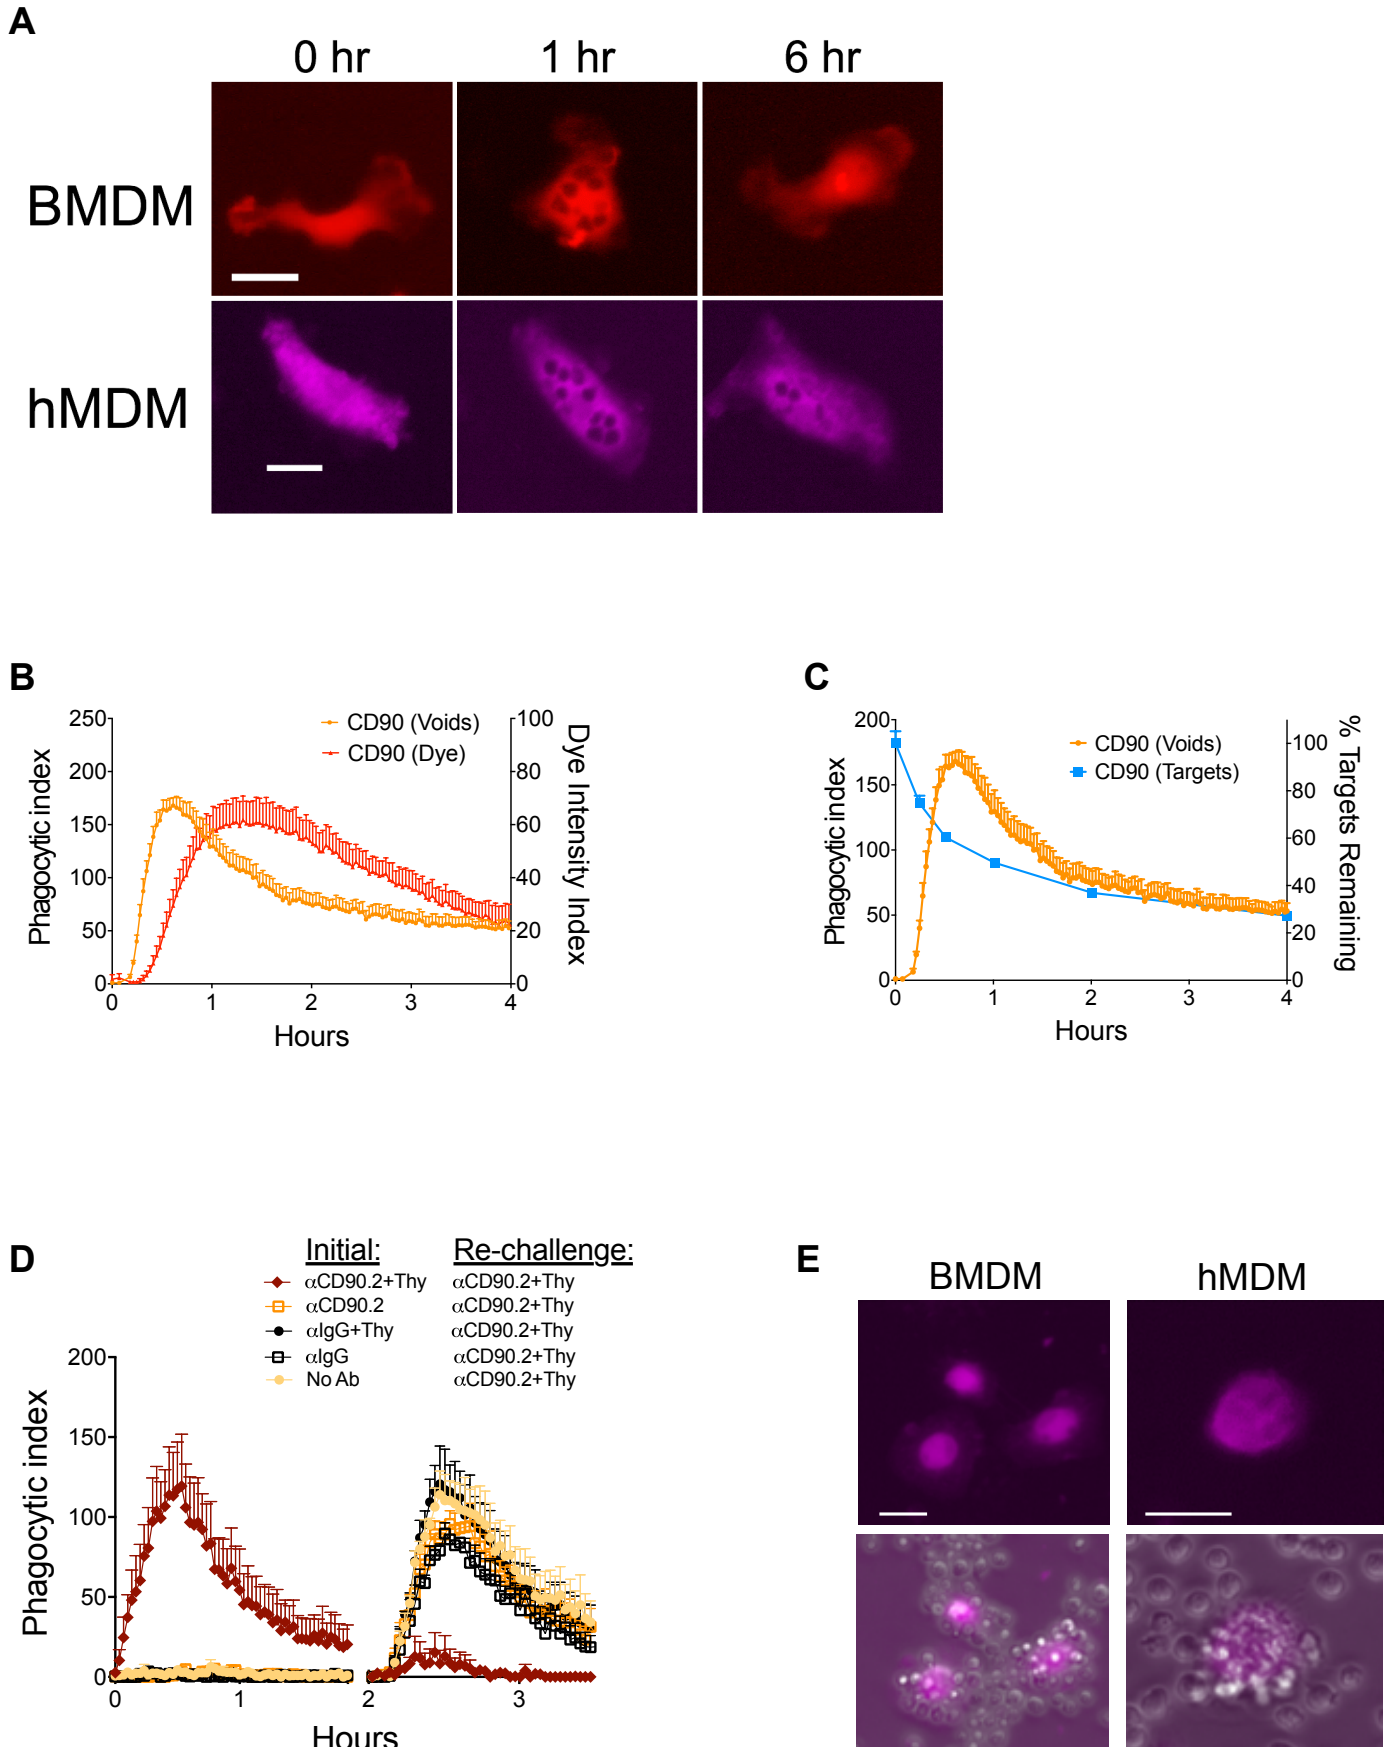



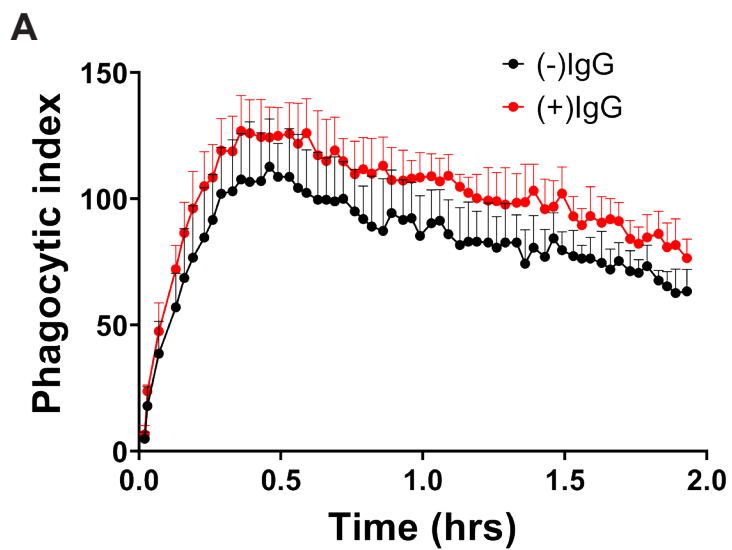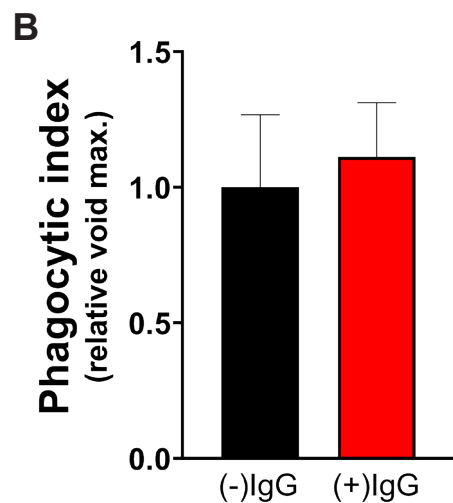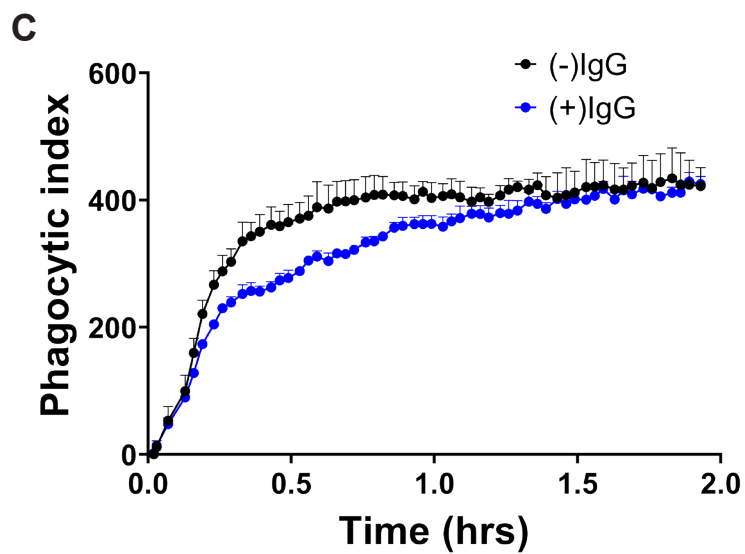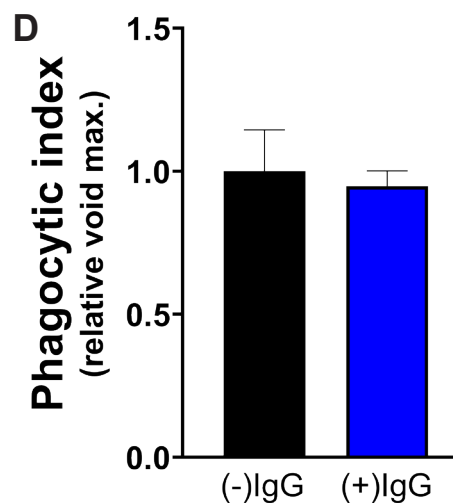

**A**

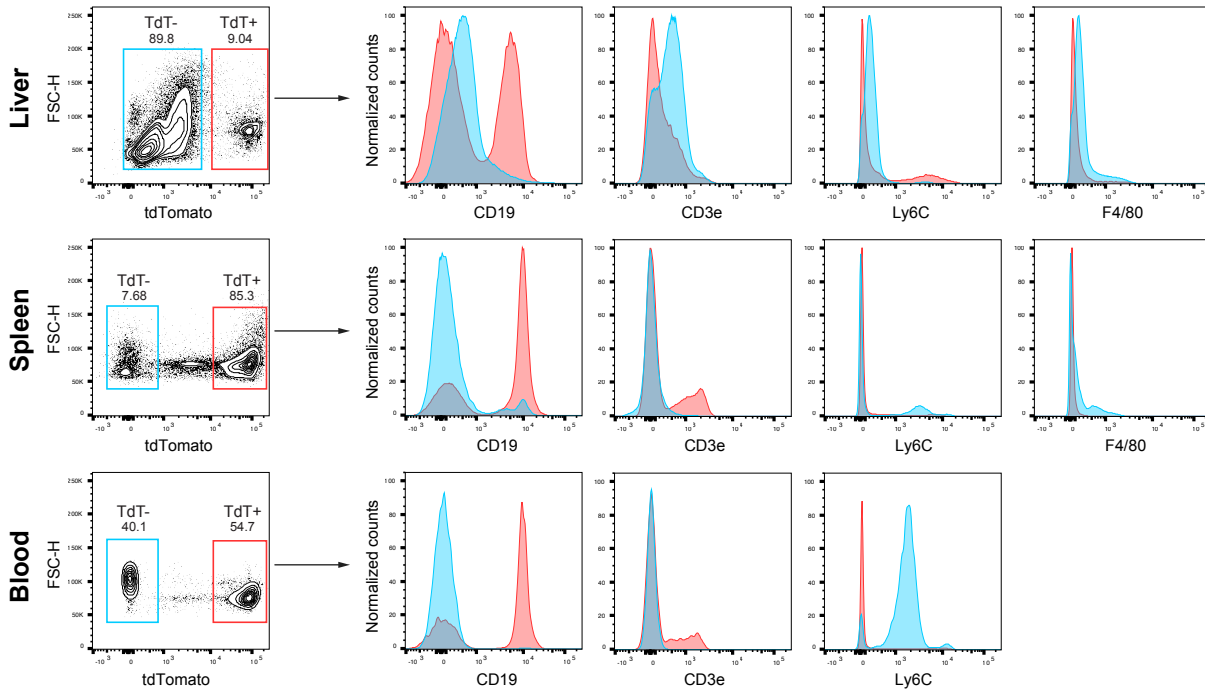

**B**

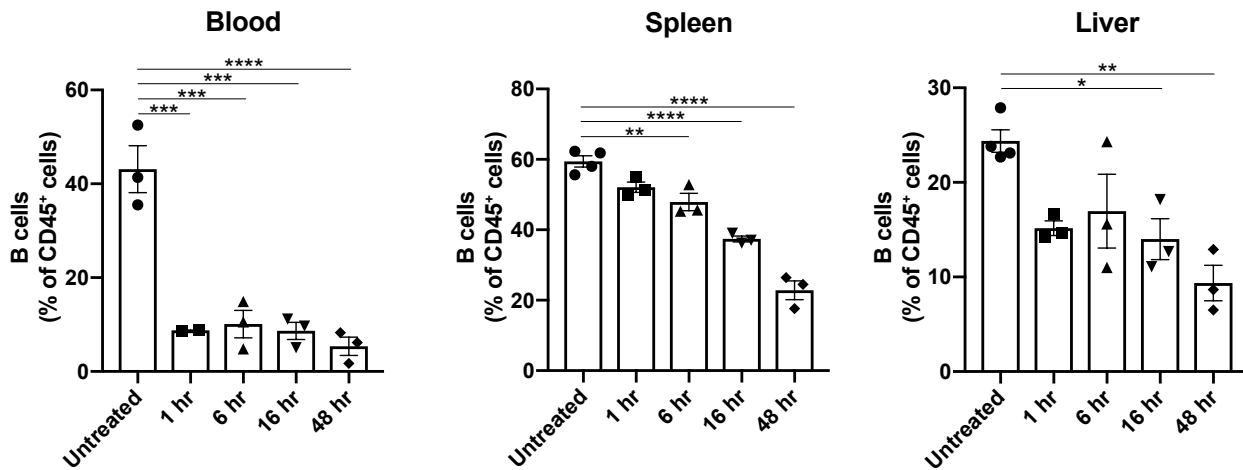

**C**

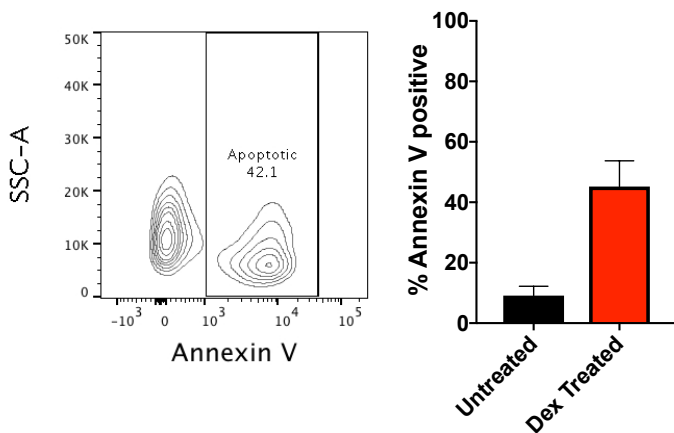

**A**

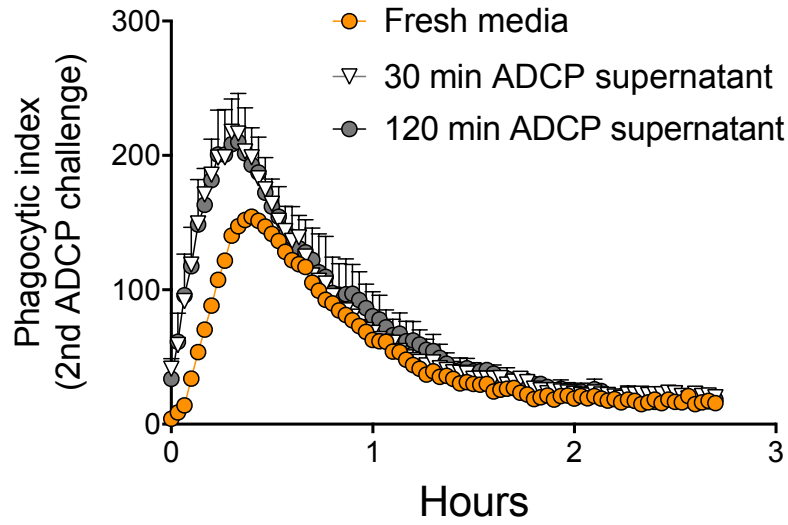

**B**

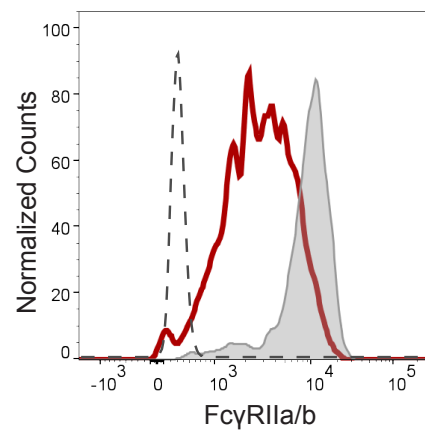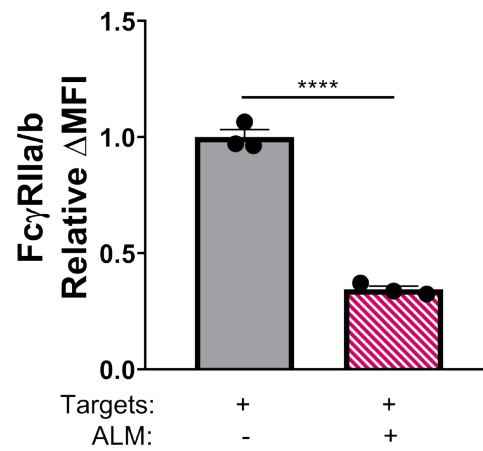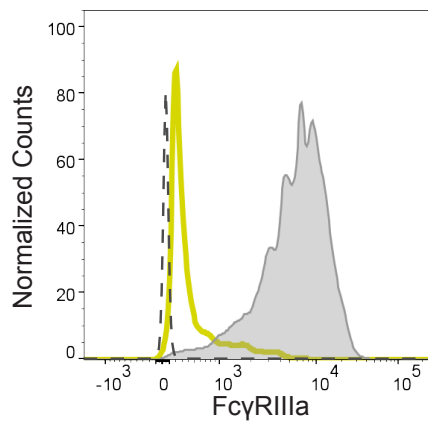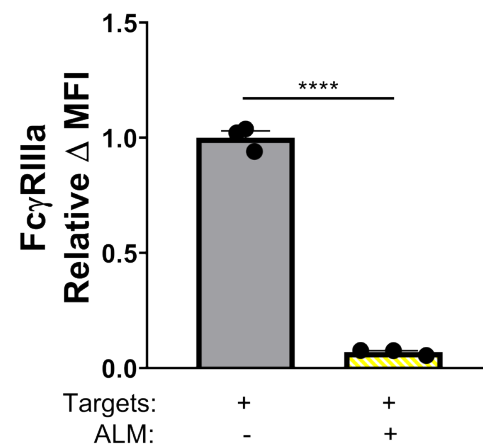

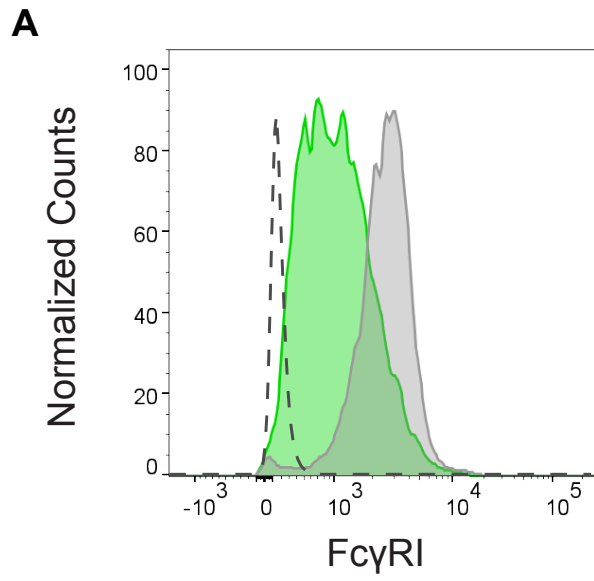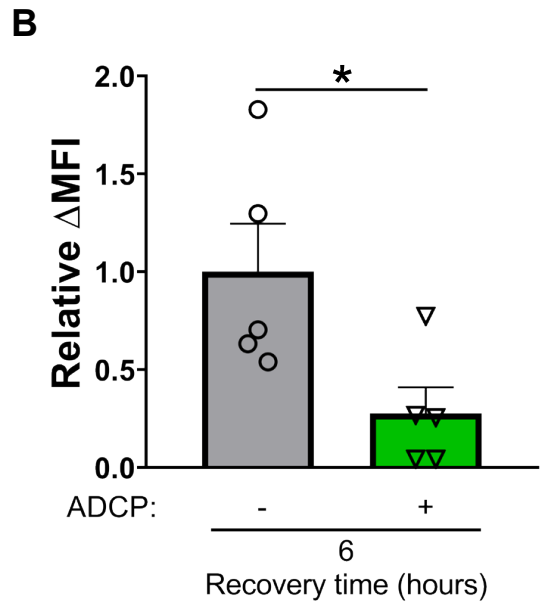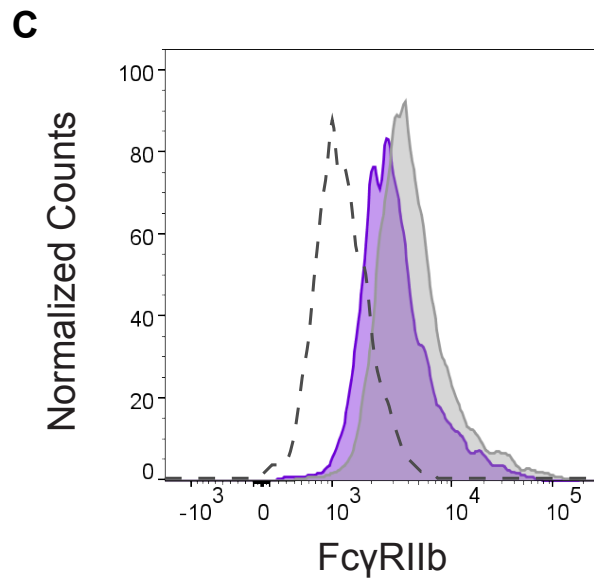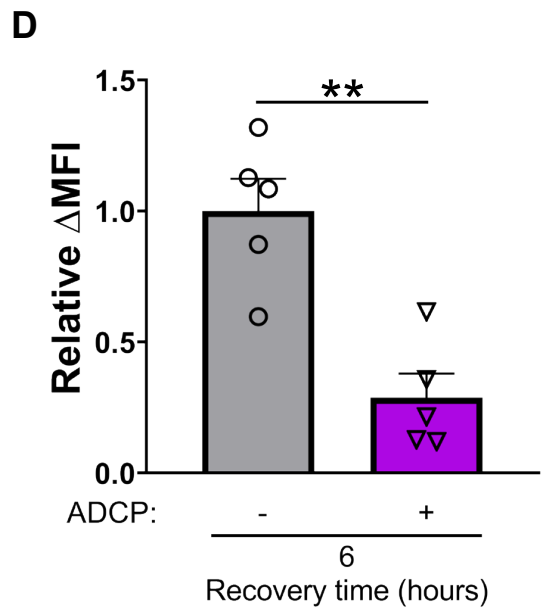

**A**

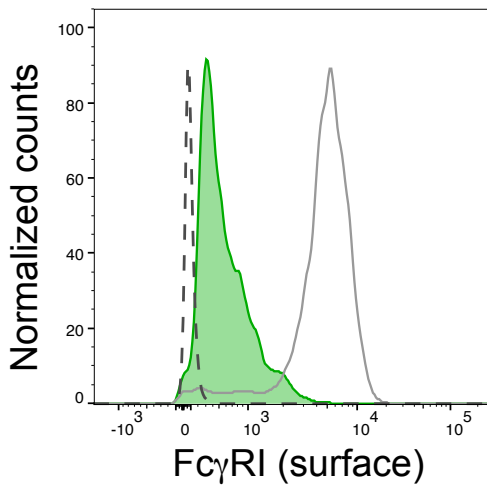

**B**

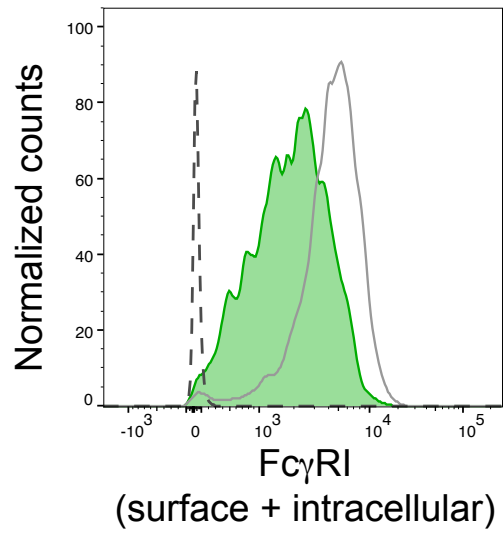

**C**

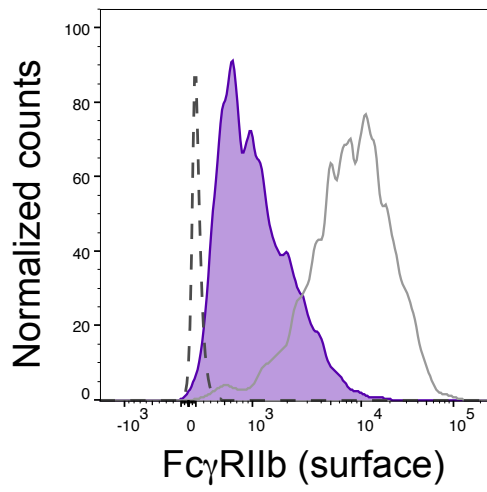

**D**

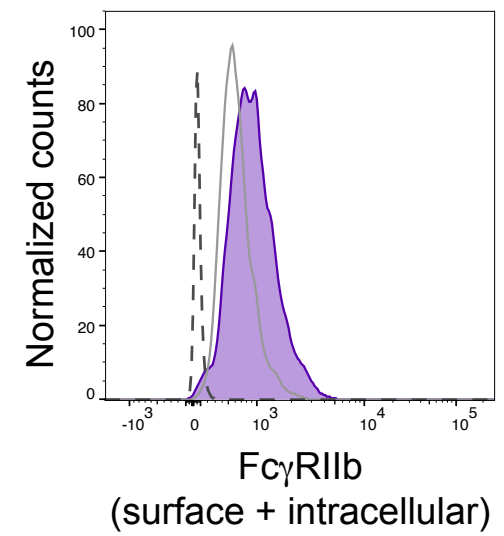

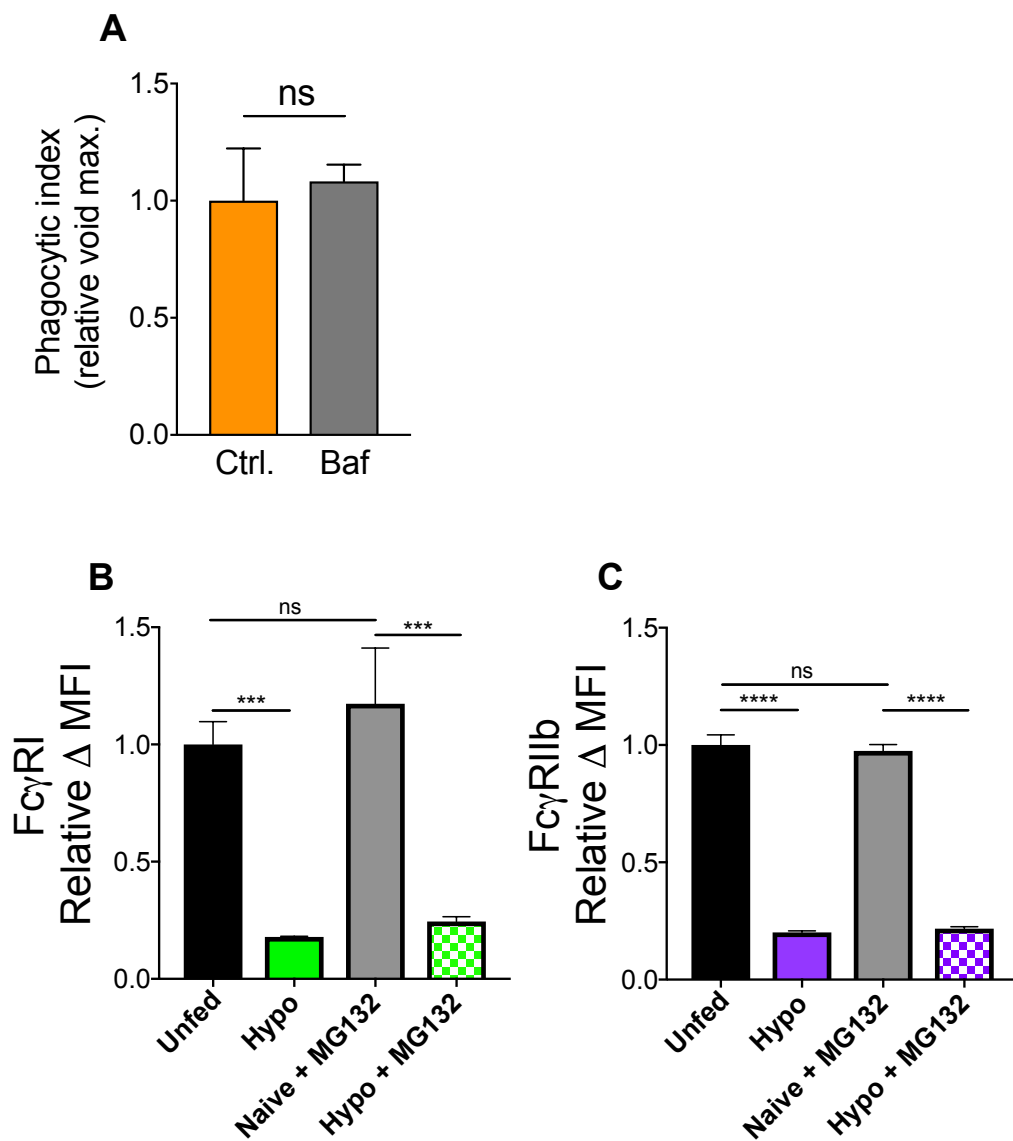

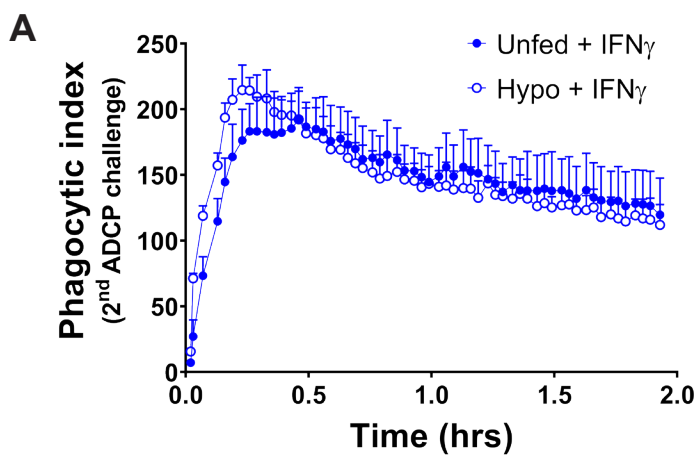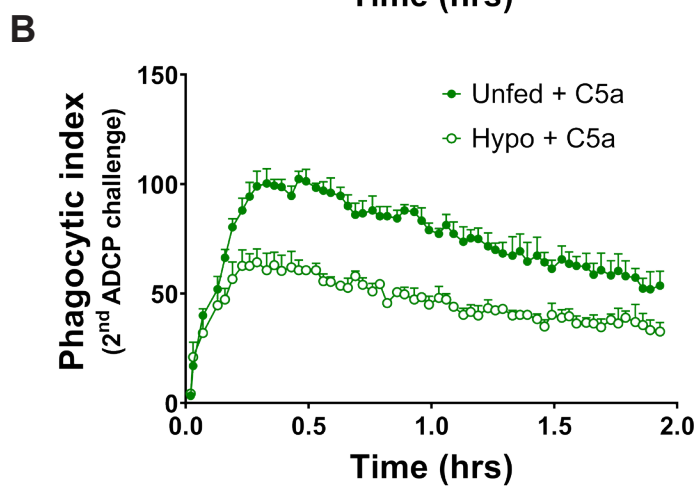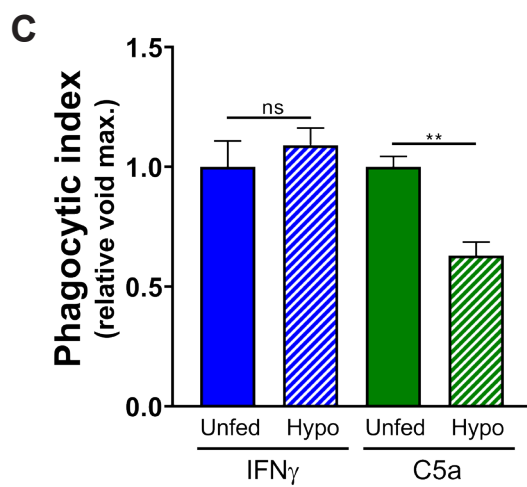

Supplement: bloodBLD2020005571-suppl1.pdf [file bloodBLD2020005571-suppl1.pdf]
